# Supplementary material
Source: publisher figshare collection journal article supplement (https://karger.figshare.com/ndownloader/files/18736421)
Supplement: Supplementary file 1 [file 18736421]

Supplemental Figure 1. Station numbers, names, and boundaries of lymph node as defined by the General Rules for the Study of Pancreatic Cancer (partially modified, Fourth English Edition).

Supplemental Figure 1. Station numbers, names, and boundaries of the lymph node as defined by General Rules for the Study of Pancreatic Cancer (Fourth English Edition).


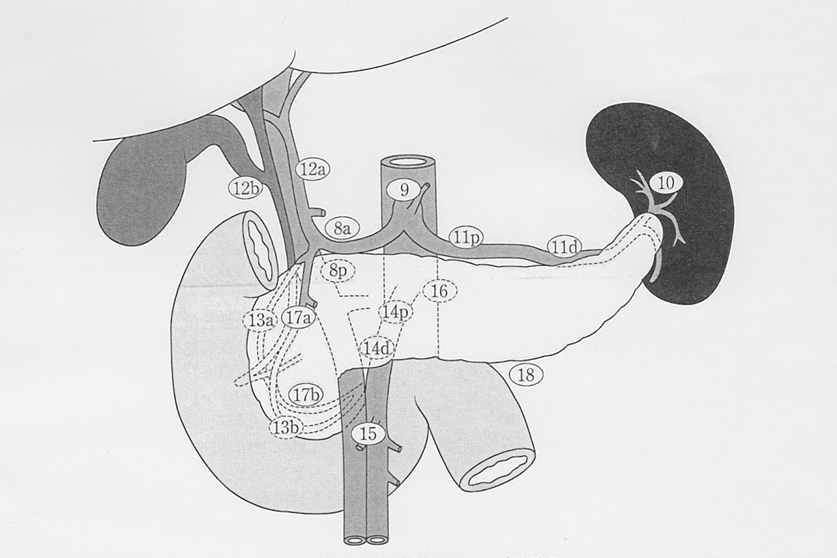


(We have permission to reprint from the Japan Pancreas Society and Kanehara-shuppan)

1: Right cardiac lymph nodes

2: Left cardiac lymph nodes

3: Lymph nodes along the lesser curvature of the stomach

4: Lymph nodes along the greater curvature of the stomach

5: Superpyloric lymph nodes

6: Infrapyloric lymph nodes

7: Lymph nodes along left gastric artery

8a: LNs along the common hepatic artery (Anterosuperior group)

8p: LNs along the common hepatic artery (Posterior group)

9: LNs along the celiac artery

10: LNs at the splenic hilum

11p: LNs along the proximal splenic artery

11d: LNs along the distal splenic artery

12a: LNs in the hepatoduodenal ligament (hepatic artery group)

12p: LNs in the hepatoduodenal ligament (portal vein group)

12b: LNs in the hepatoduodenal ligament (bile duct group)

13a: LNs on the superior posterior surface of the pancreatic head

13b: LNs on the inferior posterior surface of the pancreatic head

14p: LNs along the proximal superior mesenteric artery

14d: LNs along the distal superior mesenteric artery

15: LNs along the middle colic artery

16a1: LNs in the aortic hiatus

16a2: LNs around the abdominal aorta (from the upper margin of the celiac trunk to the lower margin of the left renal vein)

16b1: LNs around the abdominal aorta (from the lower margin of the left renal vein to the upper margin of the inferior mesenteric artery)

16b2: LNs around the abdominal aorta (from the upper margin of the inferior mesenteric artery to the aortic bifurcation)

17a: LNs on the superior anterior surface of the pancreatic head

17b: LNs on the inferior anterior surface of the pancreatic head

18: LNs along the inferior margin of the pancreas

Regional lymph nodes of pancreas

5, 6, 7, 8a, 8p, 9, 10, 11p, 11d, 12a, 12b, 13a, 13b, 14p, 14d, 17a, 17b, 18
